# Supplementary material
Source: Springer Nature journal article supplement (https://www.springermedizin.de/resource/supplementary/12936_2011_1800_MOESM3_ESM.pdf/9541828)

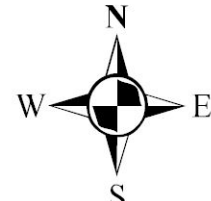

# Legend

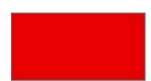

Treatment

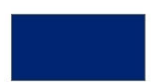

Control

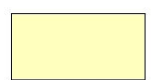

Akwa\_Ibom\_State

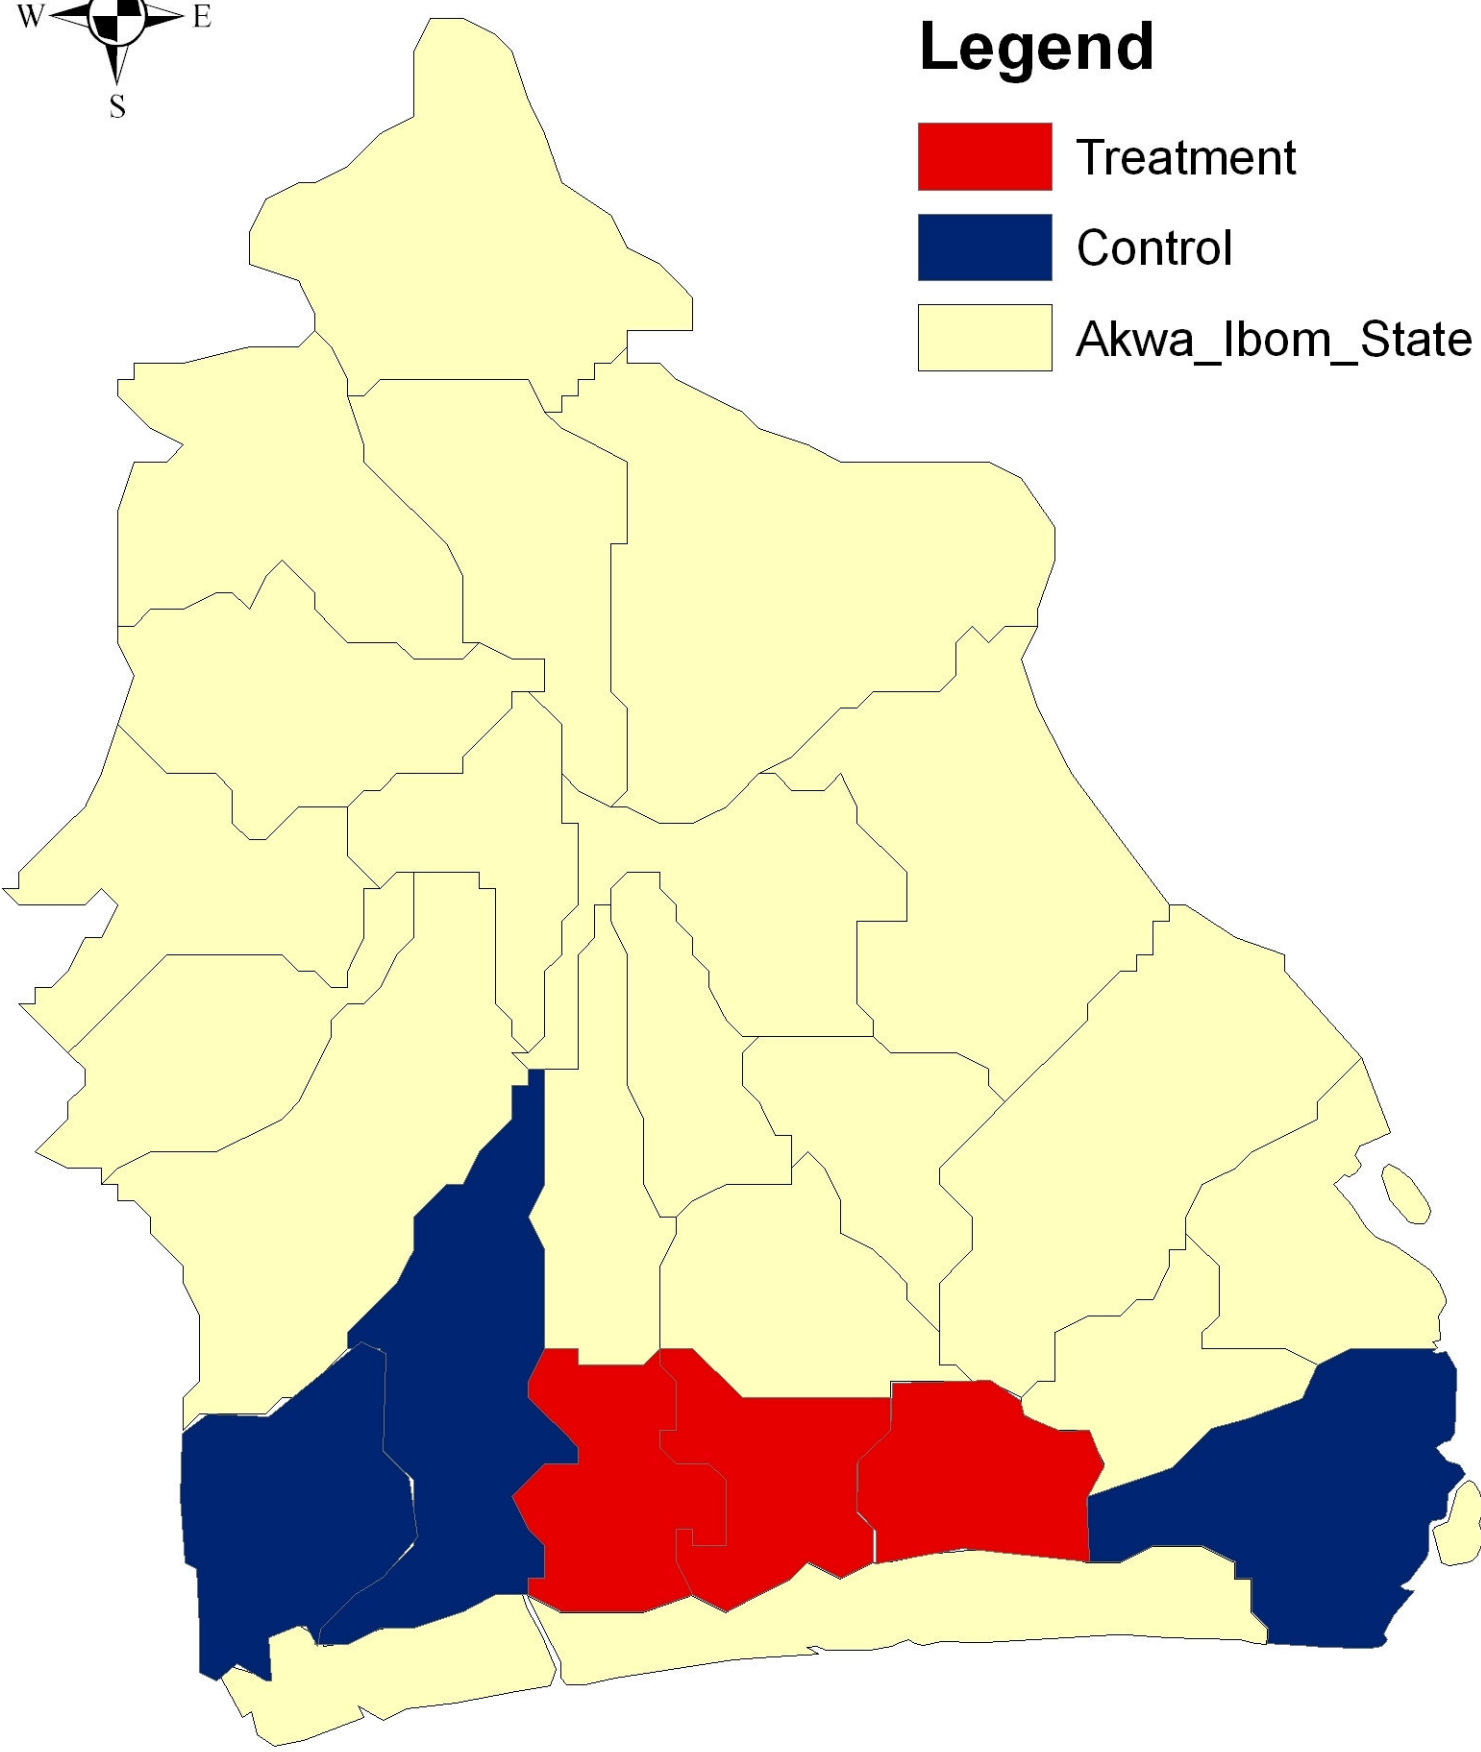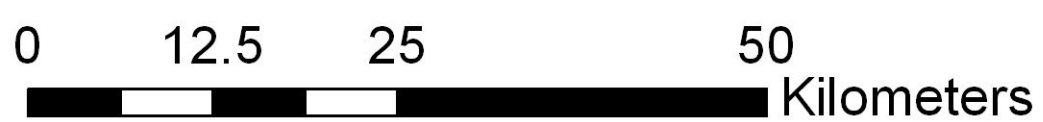

Supplement: MOESM3 [file 9541828]
